# Supplementary material for: MicroRNA-224 Induces G1/S Checkpoint Release in Liver Cancer
Source: PubMed Central journal article supplement (PMC4600154; doi:10.3390/jcm4091713), 2015-08-26
Supplement: jcm-04-01713-s001.pdf [file jcm-04-01713-s001.pdf]

## Supplementary Information

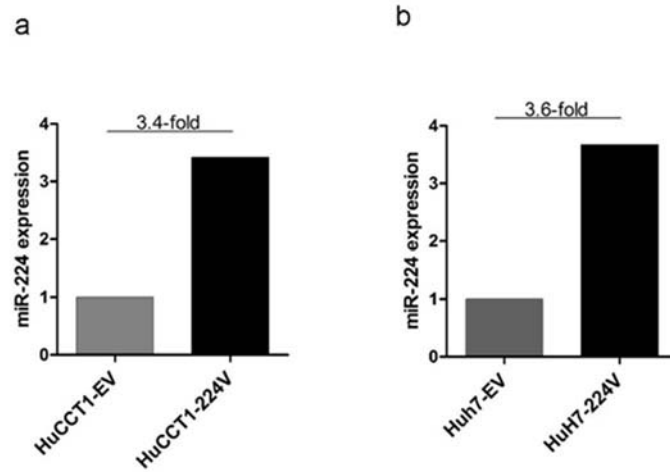

**Figure S1.** miR-224 is upregulated to physiological levels through retrovirus-mediated delivery. miR-224 is upregulated approximately 3.4- and 3.6-fold when retrovirus-mediated miR-224 delivery is employed in HuCCT1 (a) and Huh7 (b) cells, respectively. MIEG3 empty virus: EV, MIEG3-miR-224 virus -224V.
